# Supplementary material
Source: MDPI journal article supplement (https://www.mdpi.com/2076-3417/12/22/11669)
Supplement: s1 [file s1]

## Supplementary Materials

**Table S1.** P1\_1 activity, NLV and PTV dose-volume values. In bold and italic, the optimal balance between the minimum PTV 80 Gy dose threshold and the maximum NLV 70 Gy dose threshold is represented.

| Activity<br>(GBq) | NLV<br>ratio | NLV<br>(ml) | NLV<br>mean dose (Gy) | NLV<br>median dose (Gy) | PTV<br>ratio | PTV<br>(ml)  | PTV<br>mean dose (Gy) | PTV<br>median dose (Gy) |
|-------------------|--------------|-------------|-----------------------|-------------------------|--------------|--------------|-----------------------|-------------------------|
| 0.000             | 1.000        | 1245        | 0.0                   | 0.0                     | 0.000        | 0.0          | 0.0                   | 0.0                     |
| 0.250             | 1.000        | 1245        | 5.6                   | 4.8                     | 0.000        | 0.0          | 12.1                  | 10.3                    |
| 0.500             | 1.000        | 1245        | 11.2                  | 9.5                     | 0.001        | 0.2          | 24.2                  | 20.6                    |
| 0.750             | 0.998        | 1242        | 16.7                  | 14.3                    | 0.069        | 16.6         | 36.3                  | 30.9                    |
| 1.000             | 0.993        | 1236        | 22.3                  | 19.0                    | 0.146        | 35.3         | 48.4                  | 41.2                    |
| 1.250             | 0.975        | 1214        | 27.9                  | 23.8                    | 0.216        | 52.2         | 60.5                  | 51.5                    |
| 1.500             | 0.938        | 1168        | 33.5                  | 28.5                    | 0.321        | 77.3         | 72.6                  | 61.8                    |
| 1.750             | 0.892        | 1110        | 39.1                  | 33.3                    | 0.427        | 103.0        | 84.7                  | 72.1                    |
| 2.000             | 0.841        | 1047        | 44.6                  | 38.0                    | 0.519        | 125.1        | 96.8                  | 82.4                    |
| 2.250             | 0.791        | 984         | 50.2                  | 42.8                    | 0.596        | 143.6        | 108.9                 | 92.7                    |
| 2.500             | 0.739        | 920         | 55.8                  | 47.5                    | 0.658        | 158.6        | 121.0                 | 103.0                   |
| 2.598             | <b>0.719</b> | <b>895</b>  | <b>57.9</b>           | <b>49.4</b>             | <b>0.680</b> | <b>163.9</b> | <b>125.7</b>          | <b>107.0</b>            |
| 2.750             | 0.688        | 856         | 61.4                  | 52.3                    | 0.710        | 171.1        | 133.1                 | 113.3                   |
| 3.000             | 0.639        | 796         | 67.0                  | 57.0                    | 0.751        | 181.0        | 145.2                 | 123.6                   |
| 3.250             | 0.587        | 731         | 72.6                  | 61.8                    | 0.783        | 188.8        | 157.2                 | 133.9                   |
| 3.500             | 0.535        | 666         | 78.1                  | 66.6                    | 0.812        | 195.8        | 169.3                 | 144.1                   |
| 3.750             | 0.487        | 607         | 83.7                  | 71.3                    | 0.836        | 201.5        | 181.4                 | 154.4                   |
| 4.000             | 0.444        | 553         | 89.3                  | 76.1                    | 0.856        | 206.3        | 193.5                 | 164.7                   |
| 4.250             | 0.404        | 503         | 94.9                  | 80.8                    | 0.872        | 210.2        | 205.6                 | 175.0                   |
| 4.500             | 0.368        | 459         | 100.5                 | 85.6                    | 0.886        | 213.6        | 217.7                 | 185.3                   |
| 4.750             | 0.334        | 416         | 106.0                 | 90.3                    | 0.898        | 216.6        | 229.8                 | 195.6                   |
| 5.000             | 0.303        | 378         | 111.6                 | 95.1                    | 0.910        | 219.3        | 241.9                 | 205.9                   |
| 5.250             | 0.275        | 343         | 117.2                 | 99.8                    | 0.921        | 222.0        | 254.0                 | 216.2                   |
| 5.500             | 0.250        | 312         | 122.8                 | 104.6                   | 0.930        | 224.3        | 266.1                 | 226.5                   |
| 5.750             | 0.227        | 283         | 128.4                 | 109.3                   | 0.938        | 226.1        | 278.2                 | 236.8                   |
| 6.000             | 0.207        | 258         | 133.9                 | 114.1                   | 0.945        | 227.7        | 290.3                 | 247.1                   |
| 6.250             | 0.189        | 235         | 139.5                 | 118.8                   | 0.951        | 229.1        | 302.4                 | 257.4                   |
| 6.500             | 0.173        | 215         | 145.1                 | 123.6                   | 0.956        | 230.4        | 314.5                 | 267.7                   |
| 6.750             | 0.159        | 198         | 150.7                 | 128.3                   | 0.961        | 231.5        | 326.6                 | 278.0                   |
| 7.000             | 0.146        | 182         | 156.3                 | 133.1                   | 0.965        | 232.6        | 338.7                 | 288.3                   |
| 7.250             | 0.135        | 168         | 161.9                 | 137.9                   | 0.969        | 233.5        | 350.8                 | 298.6                   |
| 7.500             | 0.124        | 155         | 167.4                 | 142.6                   | 0.973        | 234.5        | 362.9                 | 308.9                   |
| 7.750             | 0.116        | 144         | 173.0                 | 147.4                   | 0.976        | 235.2        | 375.0                 | 319.2                   |
| 8.000             | 0.108        | 134         | 178.6                 | 152.1                   | 0.979        | 236.0        | 387.1                 | 329.5                   |
| 8.250             | 0.100        | 125         | 184.2                 | 156.9                   | 0.982        | 236.6        | 399.2                 | 339.8                   |

| Activity<br>(GBq) | NLV<br>ratio | NLV<br>(ml) | NLV<br>mean dose (Gy) | NLV<br>median dose (Gy) | PTV<br>ratio | PTV<br>(ml) | PTV<br>mean dose (Gy) | PTV<br>median dose (Gy) |
|-------------------|--------------|-------------|-----------------------|-------------------------|--------------|-------------|-----------------------|-------------------------|
| 8.500             | 0.094        | 117         | 189.8                 | 161.6                   | 0.985        | 237.3       | 411.3                 | 350.1                   |
| 8.750             | 0.088        | 109         | 195.3                 | 166.4                   | 0.986        | 237.7       | 423.4                 | 360.4                   |
| 9.000             | 0.082        | 103         | 200.9                 | 171.1                   | 0.988        | 238.1       | 435.5                 | 370.7                   |
| 9.250             | 0.077        | 96          | 206.5                 | 175.9                   | 0.989        | 238.4       | 447.5                 | 381.0                   |
| 9.500             | 0.073        | 91          | 212.1                 | 180.6                   | 0.990        | 238.7       | 459.6                 | 391.3                   |
| 9.750             | 0.069        | 86          | 217.7                 | 185.4                   | 0.992        | 239.1       | 471.7                 | 401.6                   |
| 10.000            | 0.065        | 81          | 223.2                 | 190.1                   | 0.993        | 239.3       | 483.8                 | 411.9                   |
| 10.250            | 0.062        | 77          | 228.8                 | 194.9                   | 0.994        | 239.5       | 495.9                 | 422.2                   |
| 10.500            | 0.058        | 72          | 234.4                 | 199.7                   | 0.995        | 239.8       | 508.0                 | 432.4                   |
| 10.750            | 0.055        | 68          | 240.0                 | 204.4                   | 0.996        | 240.0       | 520.1                 | 442.7                   |
| 11.000            | 0.052        | 65          | 245.6                 | 209.2                   | 0.996        | 240.2       | 532.2                 | 453.0                   |
| 11.250            | 0.050        | 62          | 251.2                 | 213.9                   | 0.997        | 240.3       | 544.3                 | 463.3                   |
| 11.500            | 0.047        | 59          | 256.7                 | 218.7                   | 0.998        | 240.5       | 556.4                 | 473.6                   |
| 11.750            | 0.045        | 56          | 262.3                 | 223.4                   | 0.998        | 240.6       | 568.5                 | 483.9                   |
| 12.000            | 0.042        | 53          | 267.9                 | 228.2                   | 0.998        | 240.7       | 580.6                 | 494.2                   |

Note: This table shows the expected NLV and PTV mean and median doses, the volumes (NLV and PTV) comprising the dose threshold imposed (NLV < 70 Gy, PTV > 80 Gy) and respective ratios (NLV ratio and PTV ratio) as a function of the  $^{90}\text{Y}$  activity to be administered. Based on the same dose thresholds, the optimal  $^{90}\text{Y}$  activity would be 2.598 GBq, the mean and median absorbed doses respectively 57.9 Gy and 49.4 Gy in the NLV and 125.7 Gy and 107.0 Gy in the PTV. This way, 71.9% of voxels (i.e., 895 ml) in NLV and 68.0% (i.e., 163.9 ml) in PTV end up, respectively, below 70 Gy and above 80 Gy.

**Table S2.** Comparison of the mean and median doses in NLV and PTV, estimated with: (i) the standard formula of the glass MS manufacturer's protocol, and (ii) the optimized methodology considering the minimum PTV 80 Gy dose threshold and the maximum NLV 70 Gy dose threshold.

| Case study | Administered activity (MBq) | Manufacturer's protocol |                      |                    |                      | Optimal activity (MBq) | Optimized methodology |                      |                    |                      |
|------------|-----------------------------|-------------------------|----------------------|--------------------|----------------------|------------------------|-----------------------|----------------------|--------------------|----------------------|
|            |                             | NLV mean dose (Gy)      | NLV median dose (Gy) | PTV mean dose (Gy) | PTV median dose (Gy) |                        | NLV mean dose (Gy)    | NLV median dose (Gy) | PTV mean dose (Gy) | PTV median dose (Gy) |
| P1_1       | 2750                        | 61.3                    | 52.2                 | 133.0              | 113.2                | 2598                   | 57.9                  | 49.4                 | 125.7              | 107.0                |
| P2_2       | 3347                        | 78.2                    | 68.1                 | 111.8              | 98.7                 | 3748                   | 87.5                  | 76.3                 | 125.2              | 110.6                |
| P3_3       | 3961                        | 73.0                    | 42.7                 | 92.9               | 78.9                 | 6239                   | 115.0                 | 67.2                 | 146.4              | 124.3                |
| P4_5       | 4231                        | 25.0                    | 9.4                  | 89.3               | 88.1                 | 10662                  | 62.9                  | 23.6                 | 225.0              | 222.1                |
| P5_6       | 4305                        | 90.5                    | 52.8                 | 134.6              | 99.8                 | 4397                   | 92.4                  | 54.0                 | 137.5              | 102.0                |
| P6_7       | 2814                        | 74.0                    | 67.6                 | 130.5              | 129.6                | 2274                   | 59.8                  | 54.6                 | 105.5              | 104.8                |
| P7_8       | 5604                        | 74.4                    | 70.3                 | 94.2               | 94.4                 | 8094                   | 107.4                 | 101.6                | 136.0              | 136.4                |
| P8_9       | 1537                        | 24.1                    | 0.4                  | 94.5               | 91.9                 | 4898                   | 76.9                  | 1.4                  | 301.3              | 292.8                |
| P8_10      | 4227                        | 67.1                    | 63.0                 | 117.7              | 95.8                 | 2219                   | 35.2                  | 33.1                 | 61.8               | 50.3                 |
| P10_12     | 1992                        | 70.4                    | 64.7                 | 97.6               | 88.4                 | 1471                   | 52.0                  | 47.8                 | 72.1               | 65.3                 |
| P12_14     | 4481                        | 31.2                    | 9.4                  | 151.5              | 106.9                | 8675                   | 60.4                  | 18.2                 | 293.2              | 207.0                |

Note 1: For each case study, the optimal activity was determined by the global maximum of the objective function. In some cases (e.g., P7\_8, P8\_10, and P10\_12) it would be more appropriate to choose a local maximum of the objective function rather than the global maximum. In any case, the optimized methodology must always be supervised taking into account clinical criteria, absorbed dose constraints on PTV and NLV, and other parameters that are the responsibility of the physician. In this regard, dosimetric supervision can be done based on dose-volume data as in Table A1 or using dose-volume histograms.

Note 2: These results indicate that the median is more suitable for characterizing the absorbed dose distribution in PTV and NLV than the mean.
